# Supplementary material for: Preparation, characterization and antibacterial properties of hydro-charged melt-blown nonwovens coated with an N-halamine
Source: Royal Society of Chemistry journal article supplement (doi:10.1039/d4nj01962h), 2024-01-01
Supplement: d4nj01962h1.pdf [file d4nj01962h1.pdf]

## Appendix A. Supplementary data

### **Preparation, characterization and antibacterial properties of hydro-charged melt-blown nonwovens coated with an N-halamine**

Chao Liu, <sup>\*ab</sup> Jiayan Shi, <sup>ab</sup> Fengxiang Luo<sup>ab</sup> and Xing Zhang<sup>\*ab</sup>

a. Textile and Fashion Collage, Hunan Institute of Engineering, Xiangtan 411101, China.

b. Hunan Engineering Technology Research Center for New fiber fabric and processing, Xiangtan, Hunan 411104, China.

wuyue1511@sina.com (C.L.); 22134@hnie.edu.cn (J.S.); luofengxiang3@163.com (H.Z.)  
and tulip\_90@163.com (X.Z.)

\* Corresponding Author:

Email Address: wuyue1511@sina.com (C.L.), tulip\_90@163.com (X.Z.)

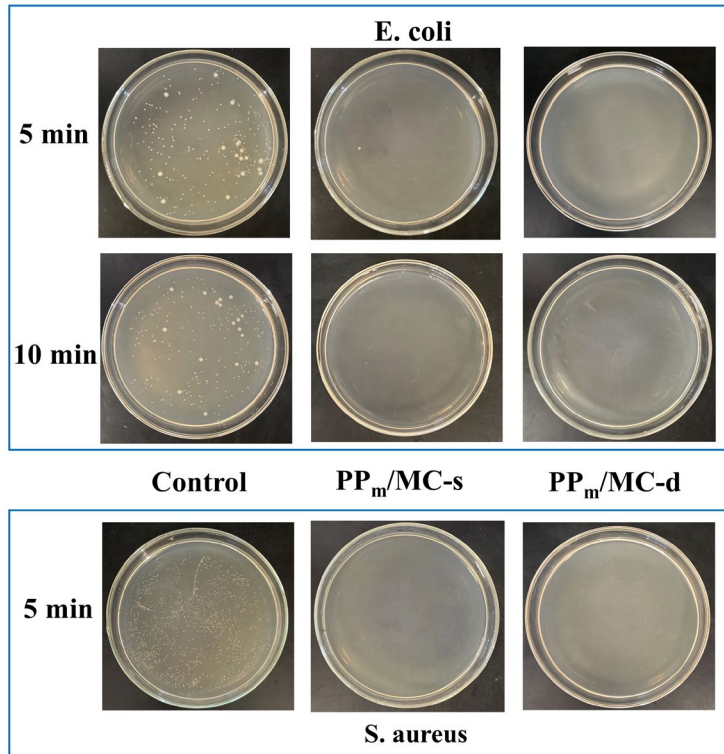

**Fig. S1** Characterization of sterilization performance of  $PP_m/MC$  melt-blown nonwoven

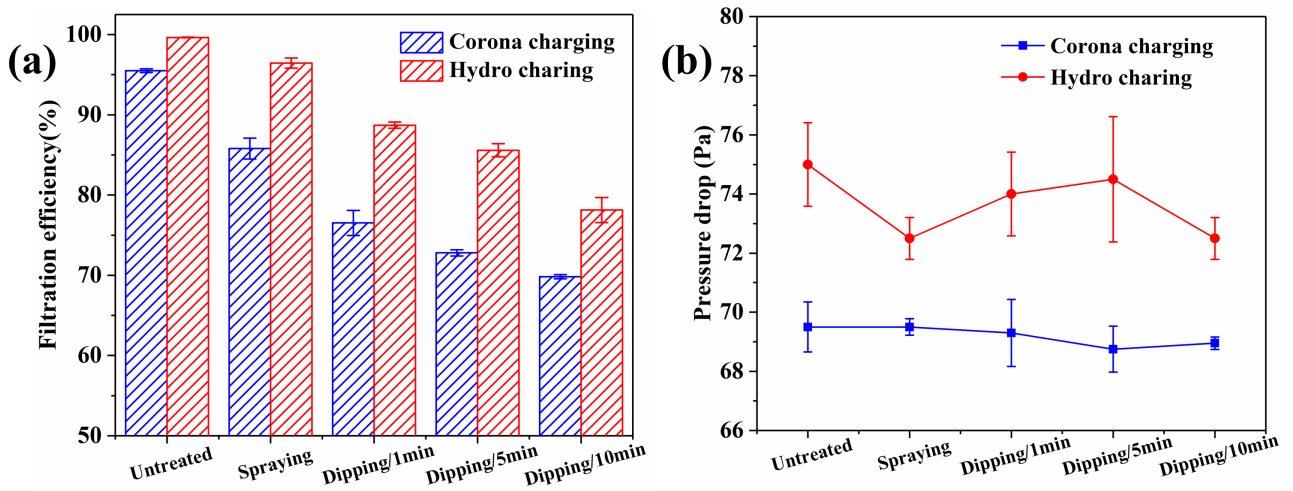

**Fig. S2** The effects of ethanol spraying and impregnation treatment on the filtration performance of electret melt blown samples: (a) filtration efficiency, (b) filtration resistance
